# Supplementary material for: Identification of CNGB1 as a Predictor of Response to Neoadjuvant Chemotherapy in Muscle-Invasive Bladder Cancer
Source: MDPI journal article supplement (doi:10.3390/cancers13153903), 2021-08-02
Supplement: s1 [file s1]

# Supplementary Materials: Identification of CNGB1 as a Predictor of Response to Neoadjuvant Chemotherapy in Muscle-Invasive Bladder Cancer

Anastasia C. Hepburn, Nicola Lazzarini, Rajan Veeratterapillay, Laura Wilson, Jaume Bacardit and Rakesh Heer

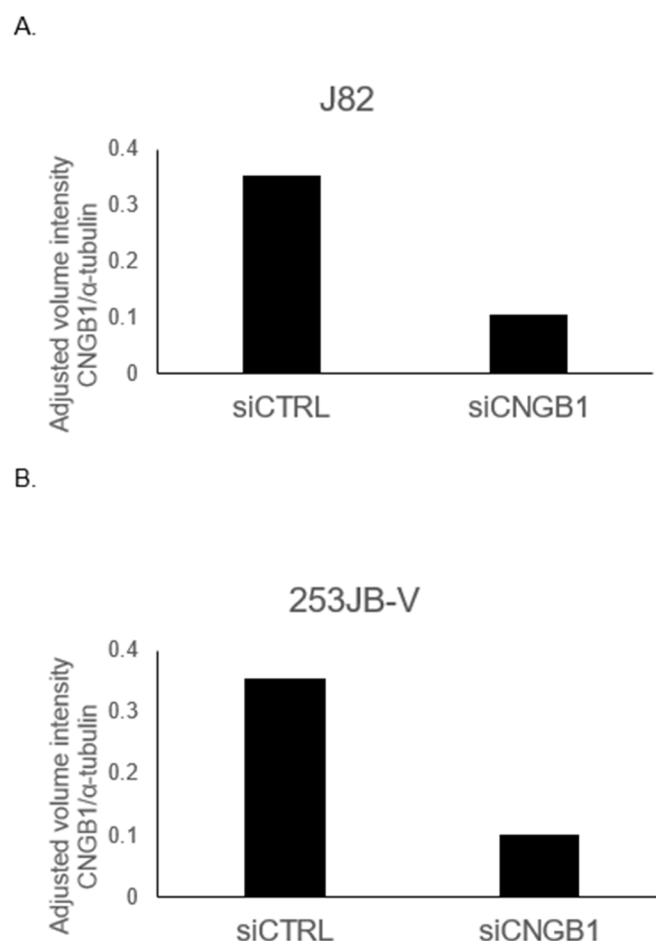

**Figure S1.** Densitometry analysis. Densitometry analysis performed using Image Lab software for western blots visualised with Biorad ChemiDoc.

**Table S1.** Full list of genes upregulated (>3-fold) in 'Responders'.

| Rank | Probe ID     | Gene Symbol      | Gene Name                                         | Fold Change |
|------|--------------|------------------|---------------------------------------------------|-------------|
| 1    | ILMN_1813490 | <i>FSD1</i>      | Fibronectin type III and SPRY domain containing 1 | 3.002926103 |
| 2    | ILMN_2096031 | <i>LOC283392</i> | Hypothetical protein                              | 3.00371882  |
| 3    | ILMN_2273053 | <i>IL15</i>      | Interleukin 15                                    | 3.046178387 |
| 4    | ILMN_1746888 | <i>PCOLCE2</i>   | Procollagen C-endopeptidase enhancer 2            | 3.052867471 |
| 5    | ILMN_1759652 | <i>C1orf61</i>   | Chromosome 1 open reading frame 61                | 3.11034367  |
| 6    | ILMN_1703855 | <i>SERPINB3</i>  | Serpin family B member 3                          | 3.12982915  |
| 7    | ILMN_1737252 | <i>NRG1</i>      | Neuregulin 1                                      | 3.167735991 |
| 8    | ILMN_1759622 | <i>G3BP2</i>     | G3BP stress granule assembly factor 2             | 3.178638308 |
| 9    | ILMN_1722489 | <i>TFF1</i>      | Trefoil factor 1                                  | 3.208230197 |
| 10   | ILMN_2119320 | <i>HIST1H4F</i>  | Histone cluster 1 H4 family member F              | 3.355192883 |

|    |              |           |                                                     |             |
|----|--------------|-----------|-----------------------------------------------------|-------------|
| 11 | ILMN_1715169 | HLA-DRB1  | Major histocompatibility complex class II DR beta 1 | 3.687332254 |
| 12 | ILMN_2165753 | HLA-A29.1 | Human leukocyte antigen (HLA)-A29                   | 6.827009407 |
| 13 | ILMN_2196479 | XRN2      | 5'-3' Exoribonuclease 2                             | 6.945393558 |

**Table S2.** Full list of genes upregulated (>3-fold) in 'Non-Responders'.

| Rank | Probe ID     | Gene Symbol | Gene Name                                           | Fold Change |
|------|--------------|-------------|-----------------------------------------------------|-------------|
| 1    | ILMN_3250412 | CNGB1       | Cyclic nucleotide gated channel beta 1              | 0.179950747 |
| 2    | ILMN_2356578 | TH          | Tyrosine hydroxylase                                | 0.211150055 |
| 3    | ILMN_1804662 | NRG4        | Neuregulin 4                                        | 0.214592774 |
| 4    | ILMN_1749118 | CALML5      | Calmodulin-like protein 5                           | 0.225483892 |
| 5    | ILMN_1677684 | BTBD16      | BTB/POZ domain-containing protein 16                | 0.237111786 |
| 6    | ILMN_2140910 | OR5P3       | Olfactory receptor 5P3                              | 0.247052675 |
| 7    | ILMN_1660718 | GABBR2      | Gamma-aminobutyric acid type B receptor subunit 2   | 0.258141468 |
| 8    | ILMN_1782141 | GRHL3       | Grainyhead-like 3                                   | 0.265609768 |
| 9    | ILMN_1733333 | CALML3      | Calmodulin-like protein 3                           | 0.27416442  |
| 10   | ILMN_1815320 | NR5A1       | Nuclear receptor subfamily 5 group A member 1       | 0.275338343 |
| 11   | ILMN_1717393 | PTCHD1      | Patched domain containing 1                         | 0.277921703 |
| 12   | ILMN_1687556 | DAPL1       | Death associated protein-like 1                     | 0.283857875 |
| 13   | ILMN_1669888 | CSTA        | Cystatin A                                          | 0.293359286 |
| 14   | ILMN_1786353 | CNGA1       | Cyclic nucleotide-gated channel alpha 1             | 0.295413409 |
| 15   | ILMN_1652366 | NLRP7       | NLR family pyrin domain containing protein 7        | 0.301105822 |
| 16   | ILMN_1699809 | CAPNS2      | Calpain small subunit 2                             | 0.303313065 |
| 17   | ILMN_1793537 | MUC15       | Mucin 15                                            | 0.304246498 |
| 18   | ILMN_3241282 | TDRD12      | Tudor domain containing 12                          | 0.3073462   |
| 19   | ILMN_1758888 | PADI3       | Peptidyl arginine deiminase, type III               | 0.308214192 |
| 20   | ILMN_1717710 | SLC26A5     | Solute carrier anion transporter family 26 member 5 | 0.309348661 |
| 21   | ILMN_1678186 | ATP6V0A4    | ATPase H+ Transporting V0 subunit A4                | 0.314885512 |
| 22   | ILMN_2190541 | XAGE2B      | X antigen family, member 2B                         | 0.31507576  |
| 23   | ILMN_1701975 | SLC9A4      | Solute carrier family 9 member A4                   | 0.317610722 |
| 24   | ILMN_1680987 | HAND1       | Heart and neural crest derivatives expressed 1      | 0.32090989  |
| 25   | ILMN_2133205 | GPX2        | Glutathione peroxidase 2                            | 0.321564307 |
| 26   | ILMN_1673191 | S100A7A     | S100 calcium-binding protein A7                     | 0.321954615 |
| 27   | ILMN_1759598 | DLX5        | Distal-less homeobox 5                              | 0.323464337 |
| 28   | ILMN_1742947 | SEC14L4     | SEC14p like lipid binding 4                         | 0.325984882 |
| 29   | ILMN_2246188 | SLC45A2     | Solute carrier family 45 member 2                   | 0.328835443 |

**Table S3.** Clinicopathological characteristics of MIBC patients of Validation Cohort 2.

| Characteristic                                   | Patients (n = 99) |
|--------------------------------------------------|-------------------|
| <b>Gender</b>                                    |                   |
| Male                                             | 65 (65.7%)        |
| Female                                           | 34 (34.3%)        |
| <b>Age</b>                                       |                   |
| Mean (range), years                              | 73.8 (48-98)      |
| <b>Clinicopathological stage at presentation</b> |                   |
| Localised                                        | 49 (49.5%)        |
| Metastatic                                       | 50 (50.5%)        |

## Western Blot Images

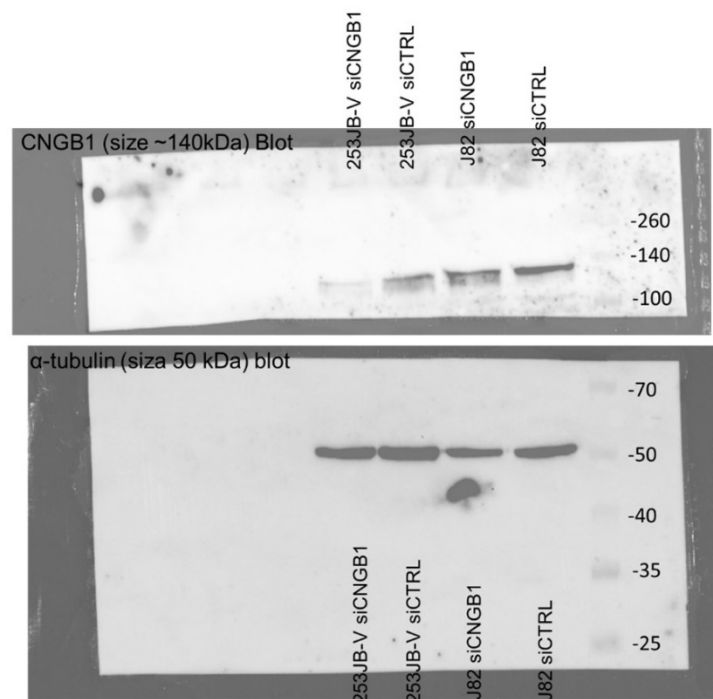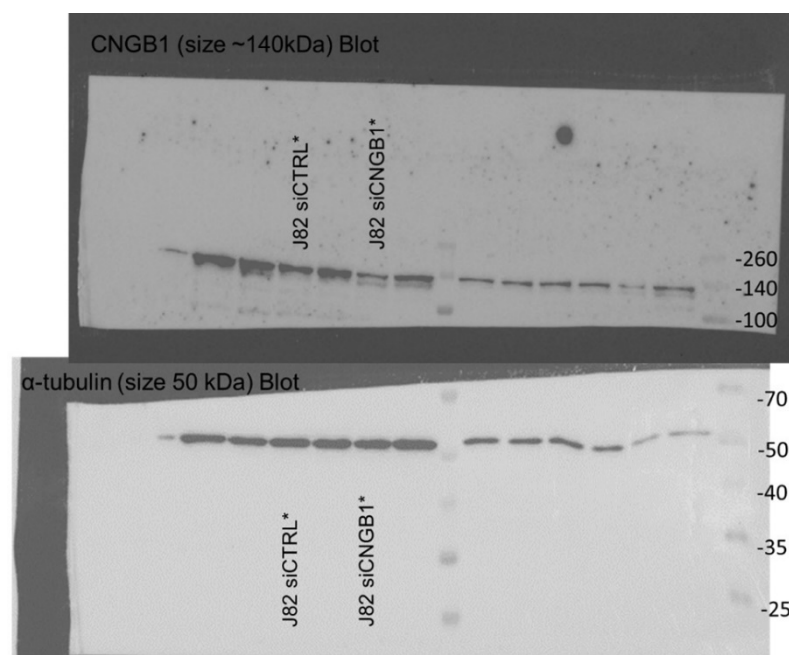

\* Bands used in Figure 5. Repeat with more equal loading. Ladder used was Spectra™ Multicolor Broad Range Protein Ladder (Cat no 26623, ThermoScientific, Waltham, MA, USA).
